# Supplementary material for: Parkinson disease male-to-female ratios increase with age: French nationwide study and meta-analysis
Source: PubMed Central journal article supplement — J Neurol Neurosurg Psychiatry. 2015 Dec 23;87(9):952–7. doi: 10.1136/jnnp-2015-312283 (PMC5013115; doi:10.1136/jnnp-2015-312283), 2015-12-23
Supplement: jnnp-2015-312283-s1.pdf [file jnnp-2015-312283-s1.pdf]

## **Online only supplementary material**

### *Tables*

- **Supplementary table 1: Characteristics of men and women identified as prevalent and incident PD cases in 2010.**
- **Supplementary table 2: Systematic review of eligible incidence studies of Parkinson's disease.**

### *Figures*

- **Supplementary figure 1: Age- and sex-specific incidence and prevalence of Parkinson's disease in France, 2010, and comparison to other studies.**
- **Supplementary figure 2: Age-specific male-to-female incidence (A) and prevalence (B) ratios of Parkinson's disease when sex was not included in the prediction model to define cases.**
- **Supplementary figure 3. Age-specific male-to-female incidence (A) and prevalence (B) ratios of Parkinson's disease when levodopa was used at the only tracer to define cases.**
- **Supplementary figure 4. Random effects meta-analysis of male-to-female incidence ratios of Parkinson's disease by age groups (40-59, 60-79, 80+ years).**
- **Supplementary figure 5: Systematic review of age-specific male-to-female incidence ratios of Parkinson's disease, by study time period (before/after 2000).**
- **Supplementary figure 6: Systematic review of age-specific male-to-female incidence ratios of Parkinson's disease, by continent (Asia, Europe, North America).**

### *Supplementary references*

**Supplementary table 1: Characteristics of men and women identified as prevalent and incident PD cases in 2010.**

| Characteristics                     | Prevalent cases |      |                       |                  |      |                       | Incident cases |      |                     |                  |      |                     |
|-------------------------------------|-----------------|------|-----------------------|------------------|------|-----------------------|----------------|------|---------------------|------------------|------|---------------------|
|                                     | Men (n=88,944)  |      |                       | Women (n=88,895) |      |                       | Men (n=15,254) |      |                     | Women (n=14,686) |      |                     |
|                                     | No.             | %    | Mean (SD)             | No.              | %    | Mean (SD)             | No.            | %    | Mean (SD)           | No.              | %    | Mean (SD)           |
| Age, years                          |                 |      | 74.7 (10.8)           |                  |      | 77.0 (10.8)           |                |      | 73.4 (12.5)         |                  |      | 75.0 (12.7)         |
| Neurologist visits                  |                 |      |                       |                  |      |                       |                |      |                     |                  |      |                     |
| ≥ 1 visit                           | 34,155          | 38.4 |                       | 30,834           | 34.7 |                       | 7,385          | 48.4 |                     | 6,938            | 47.2 |                     |
| No. of visits                       |                 |      | 2.4 (1.5)             |                  |      | 2.3 (1.6)             |                |      | 1.8 (1.1)           |                  |      | 1.7 (1.0)           |
| General practitioner visits         |                 |      |                       |                  |      |                       |                |      |                     |                  |      |                     |
| ≥ 1 visit                           | 78,372          | 88.1 |                       | 80,333           | 90.4 |                       | 11,587         | 76.0 |                     | 11,337           | 77.2 |                     |
| No. of visits                       |                 |      | 5.8 (3.3)             |                  |      | 6.3 (3.5)             |                |      | 3.5 (2.6)           |                  |      | 3.9 (2.7)           |
| Proportion of time treated          |                 |      |                       |                  |      |                       |                |      |                     |                  |      |                     |
| 100%                                | 75,627          | 85.0 |                       | 75,629           | 85.1 |                       | 12,381         | 81.2 |                     | 11,143           | 82.7 |                     |
| Mean                                |                 |      | 98.4 (6.5)            |                  |      | 98.7 (5.6)            |                |      | 97.2 (9.2)          |                  |      | 97.8 (7.8)          |
| Antiparkinsonian drug or class      |                 |      |                       |                  |      |                       |                |      |                     |                  |      |                     |
| Type 1 dopamine agonists            | 24,418          | 27.5 |                       | 20,936           | 23.6 |                       | 3,182          | 20.9 |                     | 3,225            | 22.0 |                     |
| Mean daily dose <sup>b</sup>        |                 |      | 221.0 (160.6)         |                  |      | 192.4 (154.0)         |                |      | 128.9 (129.3)       |                  |      | 116.0 (135.1)       |
| Cumulative LEDs <sup>b</sup>        |                 |      | 70,691.1 (57,871.0)   |                  |      | 60,741.2 (54,670.1)   |                |      | 23,065.5 (29,443.3) |                  |      | 20,541.9 (28,706.0) |
| Type 2 dopamine agonists            | 2,105           | 2.4  |                       | 1,715            | 1.9  |                       | 86             | 0.6  |                     | 59               | 0.4  |                     |
| Amantadine (≥ 1 claim)              | 3,657           | 4.0  |                       | 3,493            | 3.9  |                       | 199            | 1.3  |                     | 247              | 1.7  |                     |
| Anticholinergic agents <sup>a</sup> | 2,200           | 2.5  |                       | 1,782            | 2.0  |                       | 238            | 1.6  |                     | 232              | 1.6  |                     |
| COMT inhibitors                     | 17,829          | 20.1 |                       | 13,849           | 15.6 |                       | 817            | 5.4  |                     | 739              | 5.0  |                     |
| Selegiline/Rasagiline               | 4,236           | 4.8  |                       | 3,099            | 3.5  |                       | 241            | 1.6  |                     | 214              | 1.5  |                     |
| Levodopa                            | 79,028          | 88.9 |                       | 80,127           | 90.1 |                       | 12,268         | 80.4 |                     | 11,804           | 80.4 |                     |
| Mean daily dose <sup>b</sup>        |                 |      | 474.3 (335.5)         |                  |      | 410.1 (283.7)         |                |      | 290.4 (209.5)       |                  |      | 281.8 (185.0)       |
| Cumulative LEDs <sup>b</sup>        |                 |      | 159,757.0 (126,683.8) |                  |      | 137,897.4 (106,233.2) |                |      | 51,594.0 (48,248.3) |                  |      | 51,110.9 (47,625.7) |
| Piribedil                           | 12,029          | 13.5 |                       | 10,254           | 11.5 |                       | 986            | 6.5  |                     | 720              | 4.9  |                     |
| Mean daily dose <sup>b</sup>        |                 |      | 124.8 (67.4)          |                  |      | 119.3 (67.5)          |                |      | 93.7 (57.0)         |                  |      | 94.6 (67.0)         |
| Cumulative LEDs <sup>b</sup>        |                 |      | 38,604.0 (25,994.7)   |                  |      | 37,035.9 (25,201.1)   |                |      | 16,385.3 (17,788.1) |                  |      | 16,028.8 (17,133.6) |

COMT, catechol-O-methyl transferase; LED, levodopa equivalent dose; PD, Parkinson's disease; SD, standard deviation.

<sup>a</sup>No LED data were available for these classes of antiparkinsonian drugs.

<sup>b</sup>Doses were computed among treated subjects and are expressed in milligrams of LED.

**Supplementary table 2: Systematic review of eligible incidence studies of Parkinson’s disease.**

| Study               | Study period |               | Men      |              |                       | Women        |              |                       | Overall age-adjusted M-F ratio |                |     |      |              |
|---------------------|--------------|---------------|----------|--------------|-----------------------|--------------|--------------|-----------------------|--------------------------------|----------------|-----|------|--------------|
|                     |              |               | PD cases | Person-years | Inc. /10 <sup>5</sup> | PD cases     | Person-years | Inc. /10 <sup>5</sup> | Age                            | Ratio (95% CI) |     |      |              |
| Allyson-Jones, 2012 | Canada       | North America | 1992     | 2001         | 5,947                 | 1,893,300.00 | 314.11       | 4,963                 | 2,433,800.00                   | 203.92         | 65+ | 1.82 | 1.69 to 1.96 |
| Alves, 2009         | Norway       | Europe        | 2004     | 2006         | 151                   | 415,662.50   | 36.33        | 114                   | 443,448.50                     | 25.71          | 40+ | 1.56 | 1.42 to 1.71 |
| Baldereschi, 2000   | Italy        | Europe        | 1992     | 1996         | 29                    | 6,289.75     | 461.07       | 13                    | 5,860.21                       | 221.83         | 65+ | 2.12 | 1.26 to 3.57 |
| Bauso, 2012         | Argentina    | South America | 2003     | 2008         | 116                   | 156,083.20   | 74.32        | 118                   | 256,116.40                     | 46.07          | 40+ | 1.92 | 1.61 to 2.30 |
| Benito-Leon, 2004   | Spain        | Europe        | 1994     | 1998         | 19                    | 5,284.00     | 359.58       | 11                    | 7,435.00                       | 147.95         | 65+ | 2.55 | 0.93 to 6.98 |
| Bower, 1999         | USA          | North America | 1976     | 1990         | 85                    | 131,382.00   | 64.70        | 64                    | 170,257.00                     | 37.59          | 50+ | 2.02 | 1.59 to 2.57 |
| Caslake, 2013       | UK           | Europe        | 2002     | 2009         | 125                   | 269,500.00   | 46.38        | 85                    | 280,900.00                     | 30.26          | 40+ | 1.97 | 1.39 to 2.78 |
| Chen, 2001          | Taiwan       | Asia          | 1993     | 1995         | 8                     | 17,540.05    | 45.61        | 7                     | 17,308.55                      | 40.44          | 40+ | 1.10 | 0.71 to 1.70 |
| Das, 2010           | India        | Asia          | 2003     | 2007         | 10                    | 82,925.00    | 12.06        | 11                    | 74,005.00                      | 14.86          | 40+ | 0.88 | 0.37 to 2.08 |
| Duncan, 2014        | UK           | Europe        | 2009     | 2011         | 86                    | 221,993.44   | 38.74        | 67                    | 230,930.48                     | 29.01          | 40+ | 1.58 | 1.00 to 2.50 |
| Foltynie, 2004      | UK           | Europe        | 2001     | 2002         | 49                    | 154,815.00   | 31.65        | 46                    | 169,201.00                     | 27.19          | 40+ | 1.36 | 0.97 to 1.91 |
| Foltynie, 2006      | UK           | Europe        | --       | --           | 19                    | 7,132.09     | 266.40       | 16                    | 10,360.81                      | 154.43         | 65+ | 1.87 | 1.29 to 2.70 |
| Granieri, 1991      | Italy        | Europe        | 1967     | 1987         | 173                   | 898,342.07   | 19.26        | 218                   | 1,114,726.54                   | 19.56          | 40+ | 1.00 | 0.83 to 1.22 |
| de Lau, 2004        | Netherlands  | Europe        | 1990     | 1999         | 31                    | 15,447.00    | 200.69       | 36                    | 22,973.00                      | 156.71         | 55+ | 1.47 | 0.61 to 3.53 |
| Linder, 2010        | Sweden       | Europe        | 2004     | 2009         | 59                    | 125,024.00   | 47.19        | 52                    | 134,272.00                     | 38.73          | 40+ | 1.36 | 1.25 to 1.47 |
| Marttila, 1976      | Finland      | Europe        | 1968     | 1970         | 66                    | 216,891.96   | 30.43        | 112                   | 284,760.60                     | 39.33          | 40+ | 0.91 | 0.69 to 1.20 |
| Mayeux, 1995        | USA          | North America | 1988     | 1991         | 36                    | 72,807.00    | 49.45        | 47                    | 110,127.00                     | 42.68          | 45+ | 1.56 | 0.98 to 2.47 |
| Morioka, 2002       | Japan        | Asia          | 1997     | 1997         | 75                    | 266,745.63   | 28.12        | 108                   | 313,752.14                     | 34.42          | 40+ | 1.00 | 0.67 to 1.50 |
| Tan, 2007           | Singapore    | Asia          | 2001     | 2003         | 6                     | 14,132.00    | 42.46        | 6                     | 17,295.00                      | 34.69          | 50+ | 1.19 | 0.49 to 2.90 |
| Taylor, 2006        | UK           | Europe        | --       | --           | 30                    | 48,402.00    | 61.98        | 20                    | 50,211.00                      | 39.83          | 40+ | 2.31 | 1.41 to 3.80 |
| Van Den Eeden, 2003 | USA          | North America | 1994     | 1995         | 356                   | 989,778.00   | 35.97        | 228                   | 1,100,822.00                   | 20.71          | 40+ | 1.84 | 1.52 to 2.23 |
| Winter, 2010        | Russia       | Europe        | 2006     | 2008         | 140                   | 566,200.00   | 24.73        | 168                   | 771,475.00                     | 21.78          | 45+ | 1.57 | 1.31 to 1.89 |

Data were extracted for subjects 40 years and older only.

Inc., incidence (per 100,000 person-years).

Please see the Supplementary references list for complete references.

**Supplementary figure 1: Age- and sex-specific incidence and prevalence of Parkinson’s disease in France, 2010, and comparison to other studies.**

**A- Prevalence:** we present for comparison age- and sex-specific prevalence rates of Parkinson’s disease from a meta-analysis of prevalence studies.<sup>S23</sup>

**B- Incidence:** we present for comparison age- and sex-specific incidence rates of Parkinson’s disease from the studies included in our systematic review of incidence studies that also reported age- and sex-specific rates (Supplementary table 2; Supplementary references).

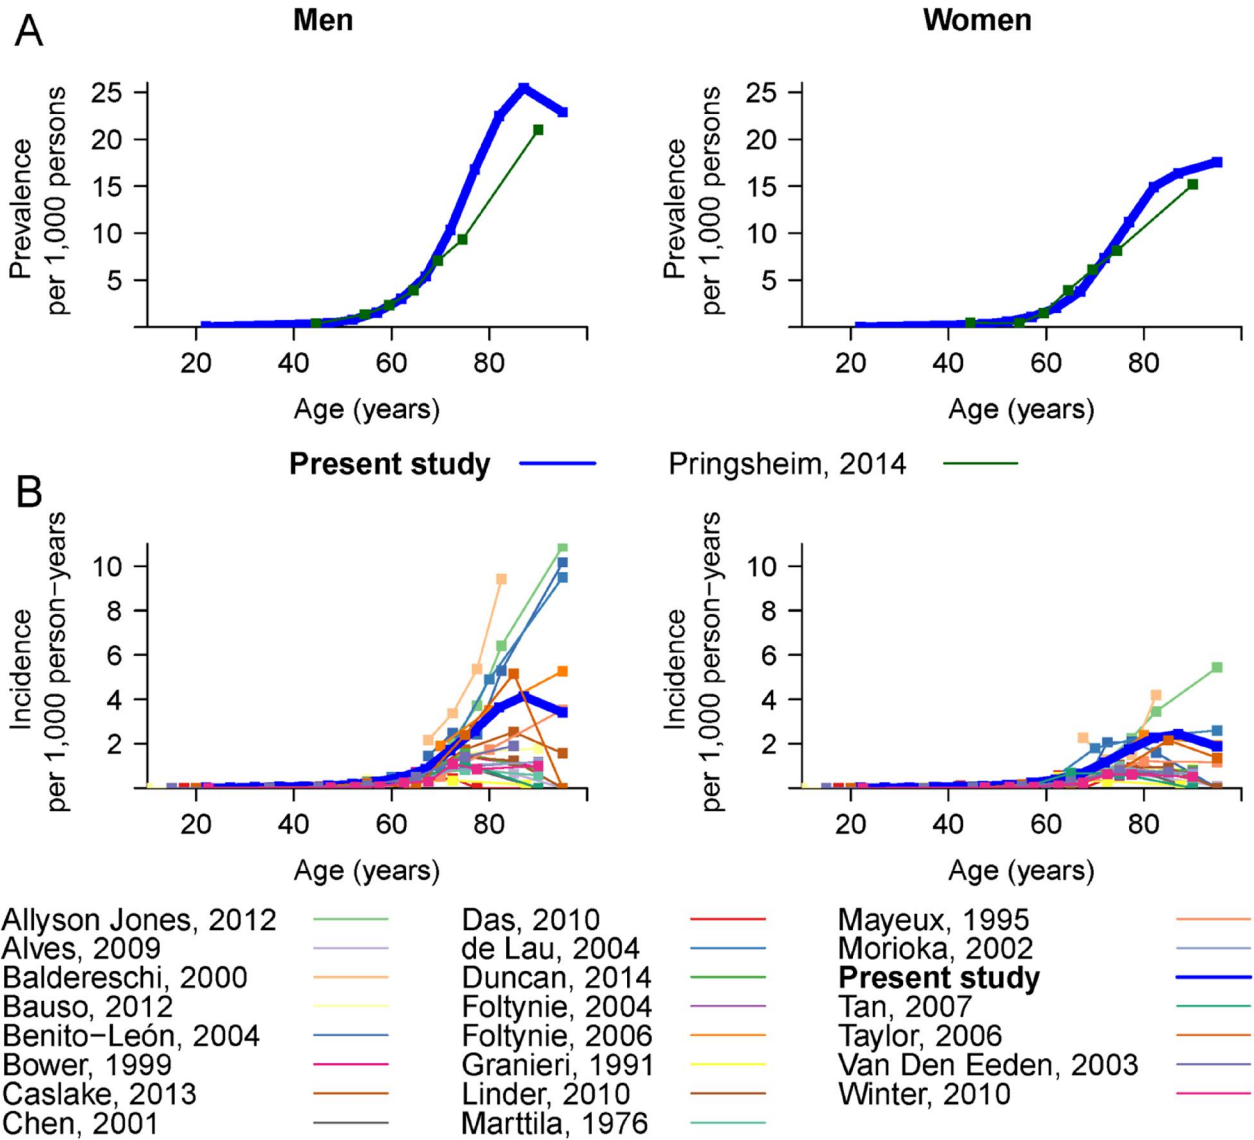

**Supplementary figure 2: Age-specific male-to-female incidence (A) and prevalence (B) ratios of Parkinson's disease when sex was not included in the prediction model to define cases.**

Solid line, observed age-specific male-to-female ratios estimated by modeling prevalence and incidence through Poisson regression.

Grey area, 95% confidence intervals of observed male-to-female ratios.

Dashed line, linear regression of male-to-female ratios weighted by the inverse of their variance on age (in years, centered at 40 years).

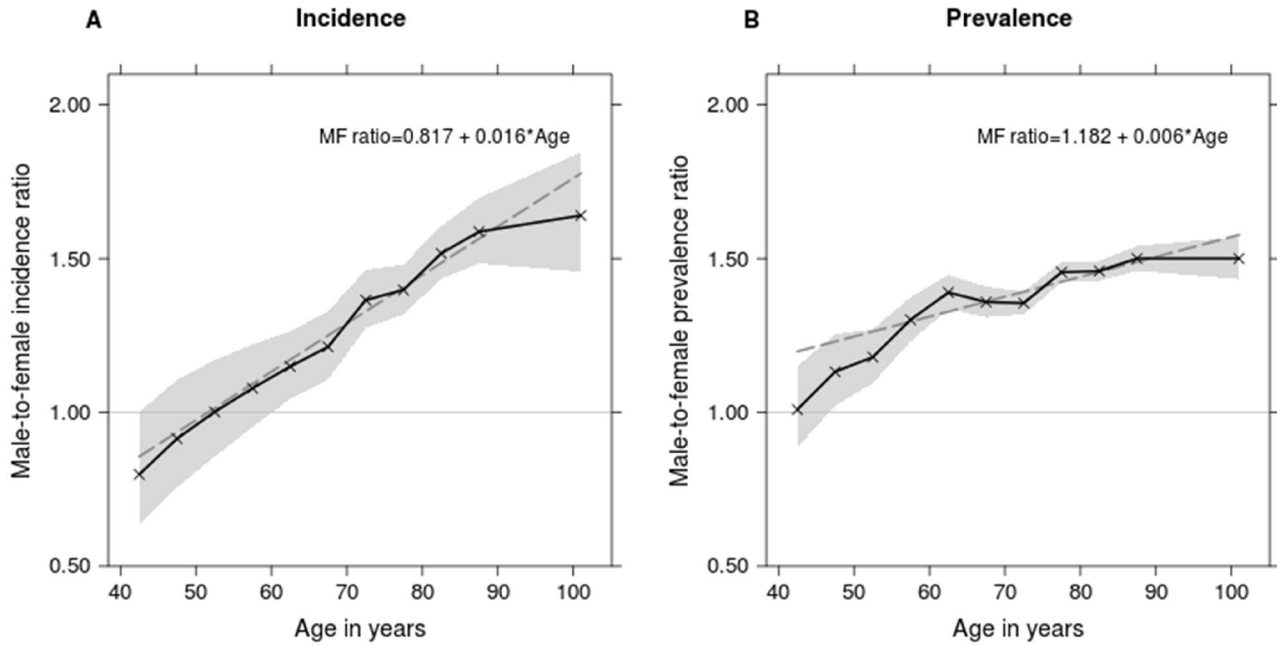

**Supplementary figure 3. Age-specific male-to-female incidence (A) and prevalence (B) ratios of Parkinson's disease when levodopa was used at the only tracer to define cases.**

Solid line, observed age-specific male-to-female ratios estimated by modeling prevalence and incidence through Poisson regression.

Grey area, 95% confidence intervals of observed male-to-female ratios.

Dashed line, linear regression of male-to-female ratios weighted by the inverse of their variance on age (in years, centered at 40 years).

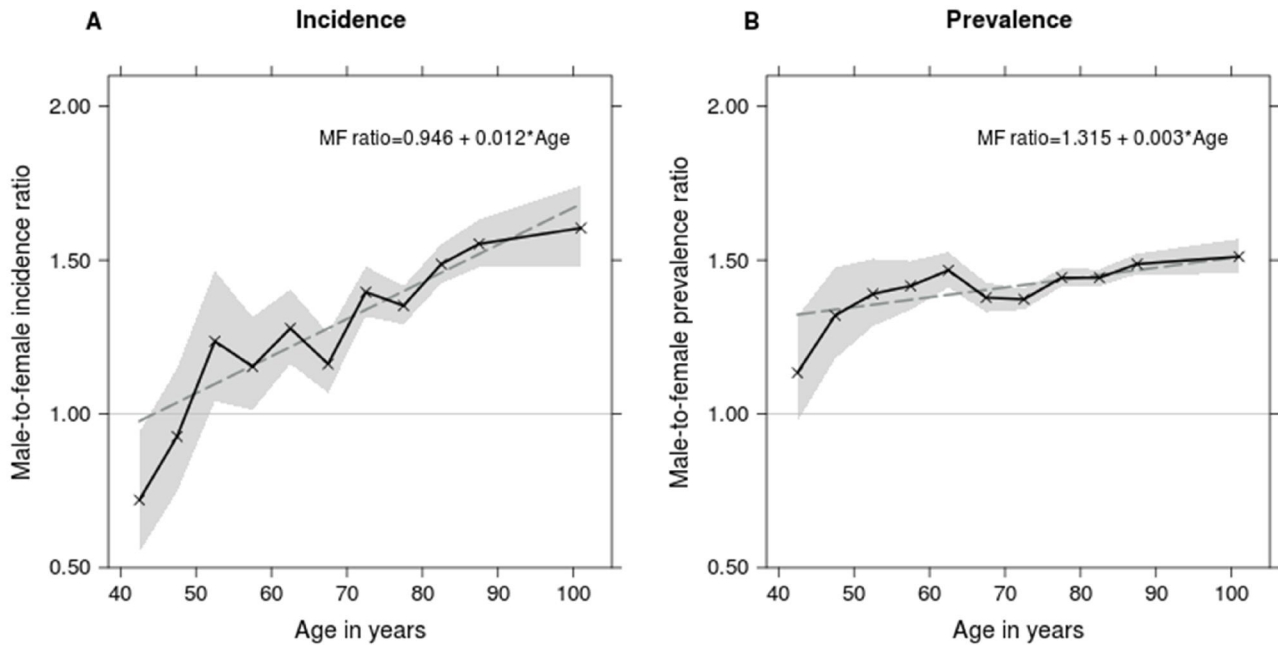

**Supplementary figure 4. Random effects meta-analysis of male-to-female incidence ratios of Parkinson's disease by age groups (40-59, 60-79, 80+ years).**

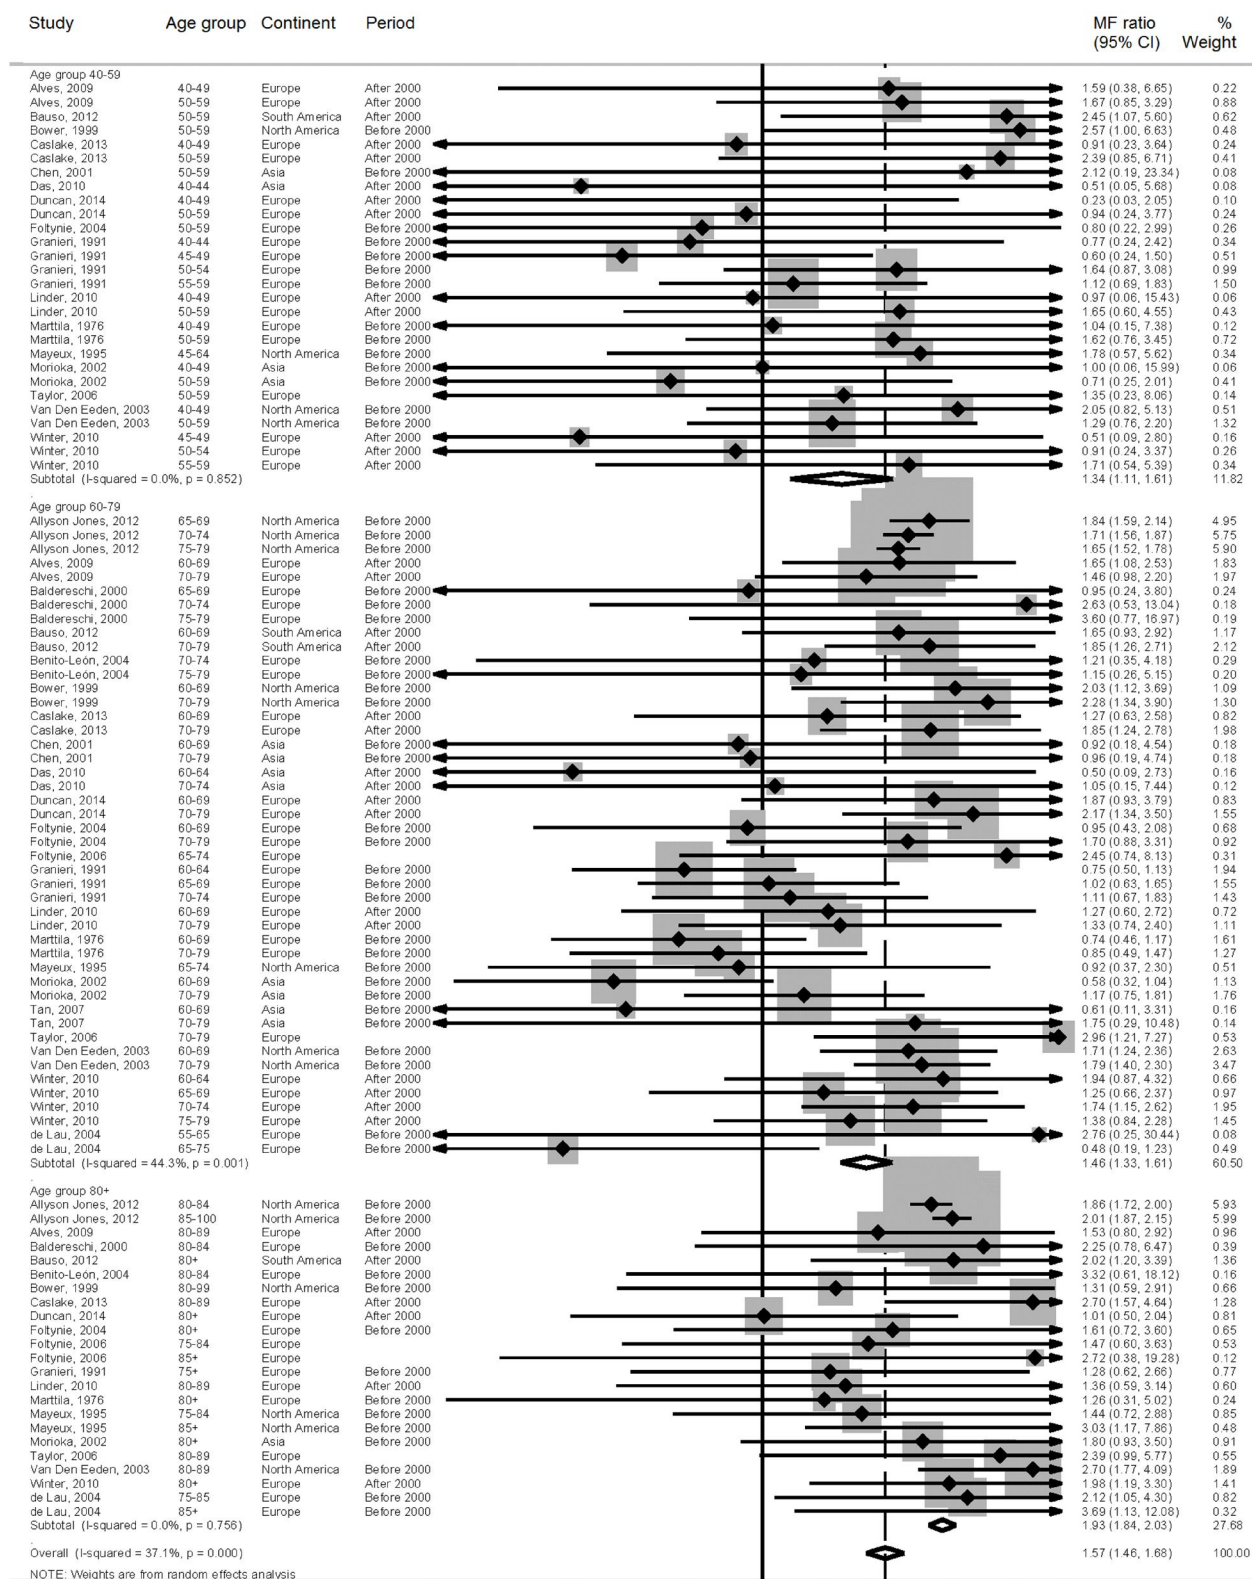

**Supplementary figure 5: Systematic review of age-specific male-to-female incidence ratios of Parkinson's disease, by study time period (before/after 2000).**

Circles represent observed male-to-female incidence ratios for each study by age by sex strata, estimated by modeling incidence through Poisson regression; their size is proportional to the variance of the male-to-female incidence ratios: more precise estimates are represented by larger circles.

Solid line, linear regression of male-to-female incidence ratios weighted by the inverse of their variance on age (in years, centered at 40 years).

Dashed line, 95% confidence intervals of the linear regression.

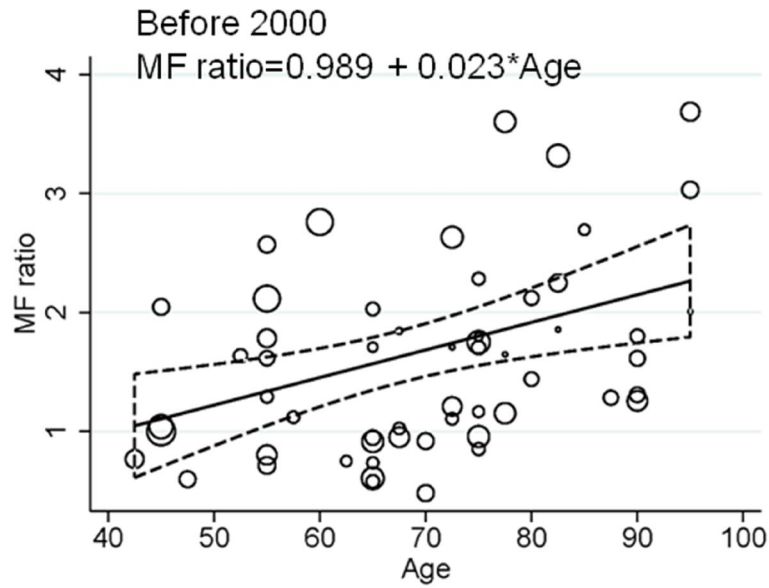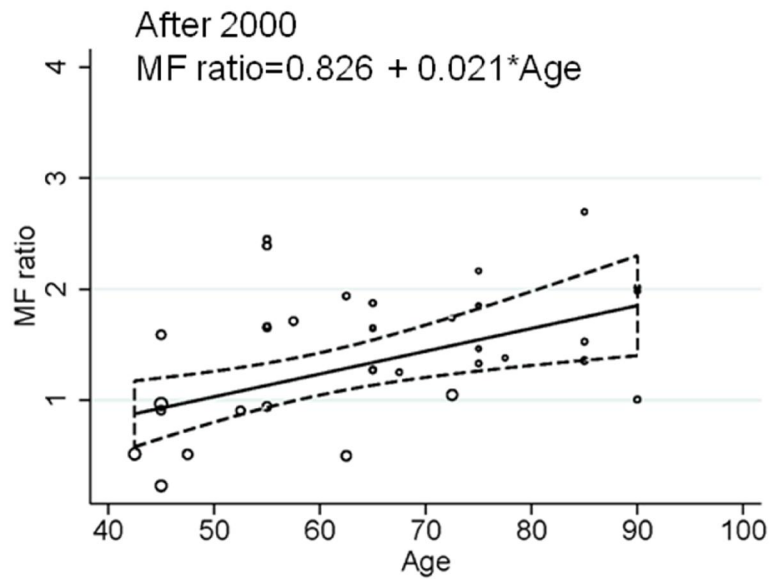

**Supplementary figure 6: Systematic review of age-specific male-to-female incidence ratios of Parkinson's disease, by continent (Asia, Europe, North America).**

Circles represent observed male-to-female incidence ratios for each study by age by sex strata, estimated by modeling incidence through Poisson regression; their size is proportional to the variance of the male-to-female incidence ratios: more precise estimates are represented by larger circles.

Solid line, linear regression of male-to-female incidence ratios weighted by the inverse of their variance on age (in years, centered at 40 years).

Dashed line, 95% confidence intervals of the linear regression.

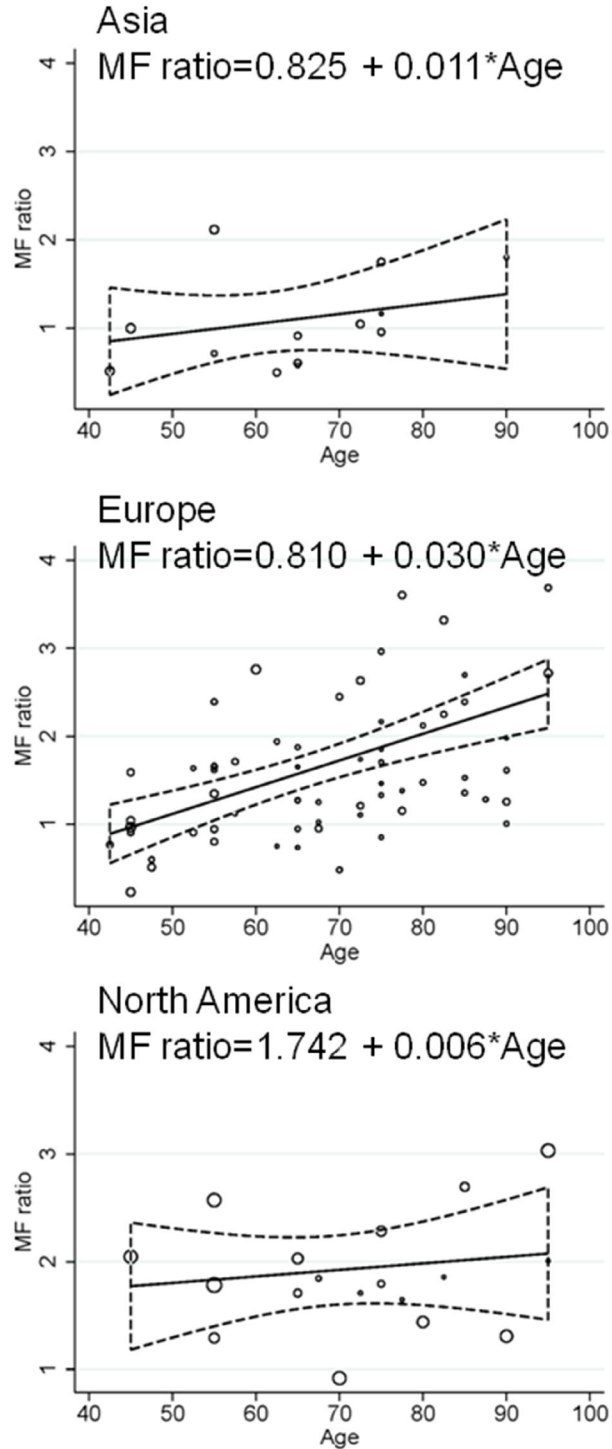



## Supplementary references

- S1. Allyson Jones C, Wayne Martin WR, Wieler M, King-Jesso P, Voaklander DC. Incidence and mortality of Parkinson's disease in older Canadians. *Parkinsonism Relat Disord* 2012;18:327-31.
- S2. Alves G, Muller B, Herlofson K et al. Incidence of Parkinson's disease in Norway: the Norwegian ParkWest study. *J Neurol Neurosurg Psychiatry* 2009;80:851-7.
- S3. Baldereschi M, Di CA, Rocca WA et al. Parkinson's disease and parkinsonism in a longitudinal study: two-fold higher incidence in men. ILSA Working Group. Italian Longitudinal Study on Aging. *Neurology* 2000;55:1358-63.
- S4. Bauso DJ, Tartari JP, Stefani CV, Rojas JI, Giunta DH, Cristiano E. Incidence and prevalence of Parkinson's disease in Buenos Aires City, Argentina. *Eur J Neurol* 2012;19:1108-13.
- S5. Benito-Leon J, Bermejo-Pareja F, Morales-Gonzalez JM et al. Incidence of Parkinson disease and parkinsonism in three elderly populations of central Spain. *Neurology* 2004;62:734-41.
- S6. Bower JH, Maraganore DM, McDonnell SK, Rocca WA. Incidence and distribution of parkinsonism in Olmsted County, Minnesota, 1976-1990. *Neurology* 1999;52:1214-20.
- S7. Caslake R, Taylor K, Scott N et al. Age-, gender-, and socioeconomic status-specific incidence of Parkinson's disease and parkinsonism in northeast Scotland: the PINE study. *Parkinsonism Relat Disord* 2013;19:515-21.
- S8. Chen RC, Chang SF, Su CL et al. Prevalence, incidence, and mortality of PD: a door-to-door survey in Ilan county, Taiwan. *Neurology* 2001;57:1679-86.
- S9. Das SK, Misra AK, Ray BK, et al. Epidemiology of Parkinson disease in the city of Kolkata, India: a community-based study. *Neurology* 2010;75:1362-9.
- S10. Duncan GW, Khoo TK, Coleman SY, et al. The incidence of Parkinson's disease in the North-East of England. *Age Ageing* 2014;43:257-63.
- S11. Foltyniec T, Brayne CE, Robbins TW, Barker RA. The cognitive ability of an incident cohort of Parkinson's patients in the UK. The CamPaIGN study. *Brain* 2004;127:550-60.
- S12. Foltyniec T, Matthews FE, Ishihara L, Brayne C. The frequency and validity of self-reported diagnosis of Parkinson's Disease in the UK elderly: MRC CFAS cohort. *BMC Neurol* 2006;6:29.:29.
- S13. Granieri E, Carreras M, Casetta I et al. Parkinson's disease in Ferrara, Italy, 1967 through 1987. *Arch Neurol* 1991;48:854-7.
- S14. de Lau LM, Giesbergen PC, de Rijk MC, Hofman A, Koudstaal PJ, Breteler MM. Incidence of parkinsonism and Parkinson disease in a general population: the Rotterdam Study. *Neurology* 2004;63:1240-4.
- S15. Linder J, Stenlund H, Forsgren L. Incidence of Parkinson's disease and parkinsonism in northern Sweden: a population-based study. *Mov Disord* 2010;25:341-8.
- S16. Marttila RJ, Rinne UK. Epidemiology of Parkinson's disease in Finland. *Acta Neurol Scand* 1976;53:81-102.
- S17. Mayeux R, Marder K, Cote LJ et al. The frequency of idiopathic Parkinson's disease by age, ethnic group, and sex in northern Manhattan, 1988-1993. *Am J Epidemiol* 1995;142:820-7.
- S18. Morioka S, Sakata K, Yoshida S et al. Incidence of Parkinson disease in Wakayama, Japan. *J Epidemiol* 2002;12:403-7.
- S19. Tan LC, Venketasubramanian N, Jamora RD, Heng D. Incidence of Parkinson's disease in Singapore. *Parkinsonism Relat Disord* 2007;13:40-3.
- S20. Taylor KS, Counsell CE, Harris CE, Gordon JC, Smith WC. Pilot study of the incidence and prognosis of degenerative Parkinsonian disorders in Aberdeen, United Kingdom: methods and preliminary results. *Mov Disord* 2006;21:976-82.
- S21. Van Den Eeden SK, Tanner CM, Bernstein AL et al. Incidence of Parkinson's disease: variation by age, gender, and race/ethnicity. *Am J Epidemiol* 2003;157:1015-22.
- S22. Winter Y, Bezdolnyy Y, Katunina E et al. Incidence of Parkinson's disease and atypical parkinsonism: Russian population-based study. *Mov Disord* 2010;25:349-56.
- S23. Pringsheim T, Jette N, Frolkis A, et al. The prevalence of Parkinson's disease: A systematic review and meta-analysis. *Mov Disord* 2014;29:1583-90.
